# Supplementary material
Source: ML conference proceedings conference paper supplement (https://openreview.net/forum?id=nJvgBolRcR)
Supplement: supplementary_material [file RefChecklistCreation-Prompt.xlsx]

## Sheet: T01LegalMDS
Name	Prompt
All Reported Opinions Cited with Shortened Bluebook Citation	You are assisting a lawyer in extracting key information from a legal case summary. Given a case summary, extract the reported opinions cited using shortened Bluebook citations if applicable. For example, the summary could write “2020 WL 4218003” after the paragraph in which it discusses that opinion. The summary does not need to include the case name, court, or date unless helpful—such as when t…
Appeal	You are assisting a lawyer in extracting key information from a legal case summary. Given a case summary, identify whether any appeals are mentioned, including which parties filed the appeal and to which court and provide the extracted information. If applicable, clearly state the information using the following format: "Appeal: [parties] appealed to [court]." Try to be as completely as possible.…
Cause of Action	You are assisting a lawyer in extracting key information from a legal case summary. Given a case summary, identify the cause of action, including whether it refers to a statute (e.g., 42 USC 1983) or a case (e.g., Ex Parte Young). Extract the crucial cause of action information as completely as possible. If no cause of action is mentioned in the case summary, state ""N/A"". This is the case summa…
Class Action or Individual Plaintiffs	You are assisting a lawyer in extracting key information from a legal case summary. Given a case summary, identify whether the case involves class action plaintiffs or individual plaintiffs. Clearly state the information using the following format: ""Plaintiffs: Class Action"" if it is a class action, or ""Plaintiffs: Individual, described as [description]"" if individual plaintiffs are involved.…
Consolidated Cases Noted	You are assisting a lawyer in extracting key information from a legal case summary. Given a case summary, identify whether any consolidated cases are mentioned and extract the crucial consolidated cases information as completely as possible. If no consolidated cases are mentioned in the case summary, state ""N/A"". This is the case summary:
Court Rulings	You are assisting a lawyer in extracting key information from a legal case summary. Given a case summary, extract the court rulings information on important filings if mentioned, such as motions to dismiss, motions for summary judgment, motions for preliminary injunctions or temporary restraining orders, motions for class certification, and motions for attorneys' fees. Note that amended complaint…
Date of Settlement	You are assisting a lawyer in extracting key information from a legal case summary. Given a case summary, extract the date of settlement information as completely as possible. If no settlement date is mentioned in the case summary, state ""N/A"". This is the case summary:
Dates of All Decrees	You are assisting a lawyer in extracting key information from a legal case summary. Given a case summary, identify whether any dates of decrees are mentioned. Extract the dates of all decrees information as completely as possible. If no decree dates are mentioned in the case summary, state ""N/A"". This is the case summary:
Disputes Over Settlement Enforcement	You are assisting a lawyer in extracting key information from a legal case summary. Given a case summary, extract the disputes over settlement enforcement information as completely as possible. If no disputes over settlement enforcement are mentioned in the case summary, state "N/A". This is the case summary:
Factual Basis of Case	You are assisting a lawyer in extracting key information from a legal case summary. Given a case summary, extract the factual basis of the case. This refers to the facts or evidence upon which the case is built. These facts are essential in the legal process and are used to support legal claims or decisions. It typically includes: 1) Details of the relevant events – For example, what happened, wh…
Filing Date	You are assisting a lawyer in extracting key information from a legal case summary. Given a case summary, extract the filing date information. Extract the crucial information as completely as possible. Example output format: MM/DD/YYYY. If no filing date is mentioned in the case summary, state "N/A". This is the case summary:
First and Last name of Judge	You are assisting a lawyer in extracting key information from a legal case summary. Given a case summary, identify the first and last name of the judge involved in the case and provide the extracted information. Example output format: [full name]. If the summary only mentioned the last name of the judge, only state the last name. If the summary only mentioned the first name of the judge, only sta…
How Long Decrees will Last	You are assisting a lawyer in extracting key information from a legal case summary. Given a case summary, extract the duration of any decrees. Extract crucial related information as completely as possible. If applicable, clearly state the information using the following format: ""[duration]."" If no duration is mentioned in the case summary, state ""N/A"". This is the case summary:
How Long Settlement will Last	You are assisting a lawyer in extracting key information from a legal case summary. Given a case summary, extract the duration of settlements information. If applicable, clearly state the information using the following format: ""[duration]."" If no settlement duration is mentioned in the case summary, state ""N/A"". This is the case summary:
Monitor Reports	You are assisting a lawyer in extracting key information from a legal case summary. Given a case summary, extract crucial monitor's reports information if available as completely as possible. A monitor's report explains whether a defendant is complying with a court order, so people want to know which terms of the order are being complied with. If no monitor's reports are mentioned in the case sum…
Name of the Monitor	You are assisting a lawyer in extracting key information from a legal case summary. Given a case summary, identify whether a monitor was appointed and note the name of the monitor if mentioned. If no monitor is mentioned in the case summary, state ""N/A"". This is the case summary:
Note Important Filings	You are assisting a lawyer in extracting key information from a legal case summary. Given a case summary, identify whether any important filings are noted, such as motions for temporary restraining orders, preliminary injunctions, motions to dismiss, motions for summary judgment, etc. Extract the important filings information as completely as possible. If no important filings are noted in the cas…
Related Cases Listed by Their Case Code Number	You are assisting a lawyer in extracting key information from a legal case summary. Given a case summary, identify whether any related cases are listed by their case code number and extract the crucial consolidated cases information as completely as possible. If no related cases are listed in the case summary, state "N/A". This is the case summary:
Remedy Sought	You are assisting a lawyer in extracting key information from a legal case summary. Given a case summary, extract the remedy sought (e.g., declaratory judgment) information. Extract the crucial remedy sought information as completely as possible. If no remedy sought is mentioned in the case summary, state "N/A". This is the case summary:
Significant Terms of Decrees	You are assisting a lawyer in extracting key information from a legal case summary. Given a case summary, extract the significant terms of decrees information. Significant terms means the substance of the decree. In a decree, the judge orders the defendants to do something. The significant terms would be what the defendants are ordered/agree to do. Extract the crucial significant terms of decrees…
Significant Terms of Settlement	You are assisting a lawyer in extracting key information from a legal case summary. Given a case summary, extract the significant terms of decrees information. Significant terms means the substance of the decree. In a decree, the judge orders the defendants to do something. The significant terms would be what the defendants are ordered/agree to do. Extract significant terms of settlements informa…
Statutory or Constitutional Basis for the Case	You are assisting a lawyer in extracting key information from a legal case summary. Given a case summary, extract the statutory or constitutional basis for the case, including any relevant constitutional clauses and amendments if applicable. A case can either be based on a statute or a provision of the Constitution--i.e., a case will either claim that someone violated a statute, or violated the C…
Trials	You are assisting a lawyer in extracting key information from a legal case summary. Given a case summary, extract trials information as completely as possible. If no trials are mentioned in the case summary, state ""N/A"". This is the case summary:
Type of Counsel	You are assisting a lawyer in extracting key information from a legal case summary. Given a case summary, identify the type of counsel mentioned (such as private, legal services, ACLU, etc.). If no type of counsel is mentioned in the case summary, state ""N/A"". This is the case summary:
Whether the Settlement is Court-enforced or Not	You are assisting a lawyer in extracting key information from a legal case summary. Given a case summary, identify whether the settlement is court-enforced. If applicable, clearly state the result using the following format: ""[Yes/No]."" If no information about court enforcement is mentioned in the case summary, state ""N/A"". This is the case summary:
Who are the Parties	You are assisting a lawyer in extracting key information from a legal case summary. Given a case summary, identify the description of the parties involved. Provide details about the plaintiff and the defendants, including any relevant positions or offices held if applicable. Present your findings using the following example format: Plaintiff: [description]; Defendants: [description]. Try to be as…

## Sheet: T04EduPAE
Name	Prompt
Evaluation of the student response	You are assisting a teacher in extracting key information from the last feedback provided by a tutor. From the following feedback, you have to extract the evaluation of the student response. This element can take one of the following values: a) Incorrect response, b) Correct response, c) Partially correct response, d) Ambiguous or unclear response, e) Off-topic response, f) Inquiring response, g)…
Mistake identification	You are assisting a teacher in extracting key information from the last feedback provided by a tutor. From the following feedback, extract the mistake pointed out in the lastest feedback in the student's response. If the feedback does not contain any mistake identification, you will write 'N/A' in your answer. An example for doing this are provided below:\n\nConversation:\nStudent: Q. You are giv…
Mistake identification type	You are assisting a teacher in extracting key information from the last feedback provided by a tutor. From the following feedback, categorize the mistake identification into one of the two categories: a) Direct and b) Indirect. If the mistake identification is a direct statement pointing out the mistake, it is Direct. If the mistake identification is an indirect statement that implies the mistake…
Mistake rectification	You are assisting a teacher in extracting key information from the last feedback provided by a tutor. From the following feedback, extract the segment(s) that suggests how to rectify the mistake in the student's response by providing a hint or suggestion. The mistake rectification can be a single word, a phrase, or a sentence. Sometimes, it can be a question that leads the student to the right an…
Mistake rectification type	You are assisting a teacher in extracting key information from the last feedback provided by a tutor. From the following feedback, categorize the mistake rectification into one of the two categories: a) Direct and b) Indirect. If the mistake rectification is a direct statement suggesting how to rectify the mistake, it is Direct. If the mistake rectification is an indirect statement that implies h…
Repeated mistake	You are assisting a teacher in extracting key information from the last feedback provided by a tutor. From the following feedback, extract the value corresponding to 'Repeated mistake:' entry. Provide the answer as 'Yes' or 'No'. If the feedback does not contain such an element you will write 'N/A' in your answer. For instance, if the feedback states 'Repeated mistake: This is a repeated mistake'…
Sub-question Transition	You are assisting a teacher in extracting key information from the last feedback provided by a tutor. From the following feedback provided along the 'Feedback:' entry of the last message from the tutor, extract the segment(s) that describes the next sub-problem. The next sub-question can be a single word, a phrase, or a sentence. If the feedback does not involve any new sub-problem and focusses o…

## Sheet: T06HealthCNG
Name	Prompt
Activities	You are an experienced doctor reviewing clinical notes to identify key medical information. Given a clinical note, extract the patient's social history: Activities information. Extract crucial related information as completely as possible. Example Format: [Activities]. If no related information is mentioned in the clinical note, state "N/A". This is the clinical note:
Alleviating and Aggravating Factors	You are an experienced doctor reviewing clinical notes to identify key medical information. Given a clinical note, extract the Alleviating & Aggravating Factors information for the Visit. Extract crucial related information as completely as possible. The alleviating and aggravating factors list what makes the Chief Complaint better and Worse. Example Format: [Alleviating and Aggravating Factors].…
Character	You are an experienced doctor reviewing clinical notes to identify key medical information. Given a clinical note, extract the Character information for the Visit. Extract crucial related information as completely as possible. The character describes how the patient describes the Chief Complaint. Example Format: [Character]. If no related information is mentioned in the clinical note, state "N/A"…
Diagnosis and Clinical Impression	You are an experienced doctor reviewing clinical notes to identify key medical information. Given a clinical note, extract the Diagnosis and Clinical Impression information. Extract crucial related information as completely as possible. Diagnosis and clinical impression provides a tentative diagnosis, assessment of patients status based on subjective and objective findings, a list of other possib…
Drugs	You are an experienced doctor reviewing clinical notes to identify key medical information. Given a clinical note, extract the patient's social history: Drugs information. Extract crucial related information as completely as possible. Example Format: [Drugs]. If no related information is mentioned in the clinical note, state "N/A". This is the clinical note:
Duration	You are an experienced doctor reviewing clinical notes to identify key medical information. Given a clinical note, extract the Duration information for the Visit. Extract crucial related information as completely as possible. The duration indicates how long the complaint has persisted. Example Format: [Duration]. If no related information is mentioned in the clinical note, state "N/A". This is th…
Eating habits	You are an experienced doctor reviewing clinical notes to identify key medical information. Given a clinical note, extract the patient's social history: Eating Habits information. Extract crucial related information as completely as possible. Example Format: [Eating Habits]. If no related information is mentioned in the clinical note, state "N/A". This is the clinical note:
Education	You are an experienced doctor reviewing clinical notes to identify key medical information. Given a clinical note, extract the patient's social history: Education information. Extract crucial related information as completely as possible. Example Format: [Education]. If no related information is mentioned in the clinical note, state "N/A". This is the clinical note:
Employment	You are an experienced doctor reviewing clinical notes to identify key medical information. Given a clinical note, extract the patient's social history: Employment information. Extract crucial related information as completely as possible. Example Format: [Employment]. If no related information is mentioned in the clinical note, state "N/A". This is the clinical note:
Family History	You are an experienced doctor reviewing clinical notes to identify key medical information. Given a clinical note, extract the Family History information for the History in the subjective section. Extract crucial related information as completely as possible. Example Format: [Family History]. If no related information is mentioned in the clinical note, state "N/A". This is the clinical note:
Home and Environment	You are an experienced doctor reviewing clinical notes to identify key medical information. Given a clinical note, extract the patient's social history: Home and Environment information. Extract crucial related information as completely as possible. Example Format: [Home and Environment]. If no related information is mentioned in the clinical note, state "N/A". This is the clinical note:
Location	You are an experienced doctor reviewing clinical notes to identify key medical information. Given a clinical note, extract the Location information for the Visit. Extract crucial related information as completely as possible. The location specifies the exact location the Chief Complaint happened. Example Format: [Location for the Visit]. If no related information is mentioned in the clinical note…
Onset	You are an experienced doctor reviewing clinical notes to identify key medical information. Given a clinical note, extract the Onset information for the Visit. Extract crucial related information as completely as possible. The onset clearly documents when the complaint started. Example Format: [Onset]. If no related information is mentioned in the clinical note, state "N/A". This is the clinical …
Other Objective Data	You are an experienced doctor reviewing clinical notes to identify key medical information. Given a clinical note, extract the Other Objective Data information. Extract crucial related information as completely as possible. Other objective data include results from laboratory and other diagnostic tests already completed. Example Format: [Other Objective Data]. If no related information is mention…
Patient Age	You are an experienced doctor reviewing clinical notes to identify key medical information. Given a clinical note, extract the Patient’s Age information. Extract crucial related information as completely as possible. Example Format: [Age]. If no related information is mentioned in the clinical note, state "N/A". This is the clinical note:
Patient Reason for the Visit	You are an experienced doctor reviewing clinical notes to identify key medical information. Given a clinical note, extract the Patient’s Reason information for the Visit. Extract crucial related information as completely as possible. Example Format: [Chest pain and shortness of breath]. If no related information is mentioned in the clinical note, state "N/A". This is the clinical note:
Patient Sex	You are an experienced doctor reviewing clinical notes to identify key medical information. Given a clinical note, extract the Patient’s Sex information. Extract crucial related information as completely as possible. Example Format: [Sex]. If no related information is mentioned in the clinical note, state "N/A". This is the clinical note:
Physical Examination Findings	You are an experienced doctor reviewing clinical notes to identify key medical information. Given a clinical note, extract the Physical Examination Findings information. Extract crucial related information as completely as possible. Physical Examination Findings includes basic systems of cardiac and respiratory, the affected systems, possible involvement of other systems, pertinent normal finding…
Radiation	You are an experienced doctor reviewing clinical notes to identify key medical information. Given a clinical note, extract the Radiation information for the Visit. Extract crucial related information as completely as possible. The radiation states whether symptoms move or stay in one spot. Example Format: [Radiation]. If no related information is mentioned in the clinical note, state "N/A". This …
Reason for Patient Office Visit or Hospitalization	You are an experienced doctor reviewing clinical notes to identify key medical information. Given a clinical note, extract the Reason for Patient Office Visit or Hospitalization information. Extract crucial related information as completely as possible. The Reason for Patient Office Visit or Hospitalization Clearly states the primary reason for the patient's visit. If multiple complaints are pres…
Relevant Medical History	You are an experienced doctor reviewing clinical notes to identify key medical information. Given a clinical note, extract the Relevant Medical History information. Extract crucial related information as completely as possible. The relevant history includes past diagnoses, surgeries, and hospitalizations. Example Format: [Relevant Medical History]. If no related information is mentioned in the cl…
Review of Systems (ROS)	You are an experienced doctor reviewing clinical notes to identify key medical information. Given a clinical note, extract the Review of Systems (ROS) information. The ROS describes an inventory of the body systems to identify signs and/or symptoms which the patient may be experiencing. The body systems must fall into one of the 14 systems: Constitutional symptoms (i.e. fever, weight loss, vital …
Severity	You are an experienced doctor reviewing clinical notes to identify key medical information. Given a clinical note, extract the Severity information for the Visit. Extract crucial related information as completely as possible. The severity state the rating from patient about the Chief Complaint using a scale of 1 to 10, 1 being the least, 10 being the worst. Example Format: [Severity]. If no relat…
Sexuality	You are an experienced doctor reviewing clinical notes to identify key medical information. Given a clinical note, extract the patient's social history: Sexuality information. Extract crucial related information as completely as possible. Example Format: [Sexuality]. If no related information is mentioned in the clinical note, state "N/A". This is the clinical note:
Suicide/Depression	You are an experienced doctor reviewing clinical notes to identify key medical information. Given a clinical note, extract the patient's social history: Suicide/Depression information. Extract crucial related information as completely as possible. Example Format: [Suicide/Depression]. If no related information is mentioned in the clinical note, state "N/A". This is the clinical note:
Surgical History	You are an experienced doctor reviewing clinical notes to identify key medical information. Given a clinical note, extract the Surgical History information. Extract crucial related information as completely as possible. Example Format: [Surgical History]. If no related information is mentioned in the clinical note, state "N/A". This is the clinical note:
Temporal Factor	You are an experienced doctor reviewing clinical notes to identify key medical information. Given a clinical note, extract the Temporal Factor information for the Visit. Extract crucial related information as completely as possible. The temporal factor indicates the Chief Complaint worse (or better) at a certain time of the day. Example Format: [Temporal Factor]. If no related information is ment…
Treatment and Management Plan	You are an experienced doctor reviewing clinical notes to identify key medical information. Given a clinical note, extract the Treatment & Management Plan information. Extract crucial related information as completely as possible. The plan is what the health care provider will do to treat the patient's concerns—such as ordering further labs, radiological work up, referrals given, procedures perfo…
Vital Signs	You are an experienced doctor reviewing clinical notes to identify key medical information. Given a clinical note, extract the Vital Signs (eg. BP, HR, RR, Temp, SpO2, weight, height if relevant) information. Extract crucial related information as completely as possible. Example Format: [Vital Signs]. If no related information is mentioned in the clinical note, state "N/A". This is the clinical n…

## Sheet: T07ChemMDG
Name	Prompt
Biological Function and Applications	You are assisting a chemical researcher in extracting key information from a molecule description. Given a molecule description, extract the biological function and applications information: The molecule’s functions in living organisms, including its interactions, effects on biological processes, and applications in the pharmacological domain. Extract crucial related information as completely as …
Chemical Compound Classifications	You are assisting a chemical researcher in extracting key information from a molecule description. Given a molecule description, extract the chemical compound classification information: The specific group(s) of atoms that are used to categorize chemical compounds based on their structural characteristics, functional groups, or biological origin. Extract crucial related information as completely …
Conjugate acid	You are assisting a chemical researcher in extracting key information from a molecule description. Given a molecule description, extract the conjugate acid: The species that remains after an base accepts a proton (H⁺) in a chemical reaction. Extract crucial related information as completely as possible. Usually, but not always, this description begins with “It is a conjugate acid of”. Only respon…
Conjugate base	You are assisting a chemical researcher in extracting key information from a molecule description. Given a molecule description, extract the conjugate base: The species that remains after an acid donates a proton (H⁺) in a chemical reaction. Extract crucial related information as completely as possible. Usually, but not always, this description begins with “It is a conjugate base of”. Only respon…
Origin	You are assisting a chemical researcher in extracting key information from a molecule description. Given a molecule description, extract the Origin: The specific natural resource the molecule has been extracted or obtained from. Extract crucial related information as completely as possible. Usually, but not always, this description begins with “It is isolated from”. Only respond with extracted te…
Structure	You are assisting a chemical researcher in extracting key information from a molecule description. Given a molecule description, extract the Structure: the chemical composition of the molecule. Extract crucial related information as completely as possible. Usually, but not always, this description begins with “The molecule is”. Only respond with extracted text from the description related to the …

## Sheet: T08BioPDG
Name	Prompt
Cellular Localization	You are assisting a protein researcher in extracting key information from a protein description. Given a protein description, extract the Cellular Localization: Cellular location (e.g., mitochondrial matrix, cell membrane). Extract the curcial related information as completely as possible. Extractions should come directly from the description in full sentence(s). Only respond with the cellular lo…
Domain/Motif	You are assisting a protein researcher in extracting key information from a protein description. Given a protein description, extract the Domains and Motifs: Functional regions (e.g., kinase domain, zinc finger) information. Extract the curcial related information as completely as possible. Extractions should come directly from the description in full sentence(s). Only respond with the domain and…
Functional Role	You are assisting a protein researcher in extracting key information from a protein description. Given a protein description, extract the Functional Role: How a molecule contributes to biological systems, including the processes it is involved in (e.g., metabolism, cellular functions) and the specific role it plays (e.g., enzymatic, structural, or signaling). Extract the curcial related informati…
Gene Ontology	You are assisting a protein researcher in extracting key information from a protein description. Given a protein description, extract the Gene Ontology: Key GO terms mentioned. Should start with “GO:”. Extract the curcial related information as completely as possible. Extractions should come directly from the description in full sentence(s). Only respond with the GO terms. If no GO terms are ment…
Interactions	You are assisting a protein researcher in extracting key information from a protein description. Given a protein description, extract the Interactions: The physical and functional associations within a cell or organism, including but not limited to protein partners, ligands/substrates, and cofactors. Extract the curcial related information as completely as possible. Extractions should come direct…

## Sheet: T11CyberRDG
Name	Prompt
Attack Tools	You are assisting a cybersecurity expert in extracting key information from a risk description. Given a risk description, extract the attack tools. Attack tools are tools which may indirectly inject a prompt to the agent to make it execute certain actions. Extractions should come directly from the description as a list of attack tool names. Only respond with the attack tools. If no attack tools a…
Label		No prompt, output is binary.
Motivation	You are assisting a cybersecurity expert in extracting key information from a risk description. Given a risk description, extract the motivation. The motivation is the underlying reason or origin of potential risk in the system. The user may unintentionally specify a task that may be risky or maliciously induces the agent to behave badly. Extract the crucial related information as completely as p…
Outcome	You are assisting a cybersecurity expert in extracting key information from a risk description. Given a risk description, extract the outcome. The outcome is the result after the agent executes the task, including any effects, neutral or harmful, intended or unintended, that may arise. Extract the crucial related information as completely as possible. Extractions should come directly from the des…
Trigger	You are assisting a cybersecurity expert in extracting key information from a risk description. Given a risk description, extract the trigger. The trigger is the action the agent does to activate the motivation during execution. Extract the crucial related information as completely as possible. Extractions should come directly from the description in full sentence(s). Only respond with the trigge…
Trigger tools	You are assisting a cybersecurity expert in extracting key information from a risk description. Given a risk description, extract the trigger tools. Trigger tools are the specific tools that bring the system closer to the attacker's goal during execution. Extractions should come directly from the description as a list of trigger tool names. Only respond with the trigger tools. If no trigger tools…
